# Supplementary material
Source: Research Square preprint supplement (doi:10.21203/rs.3.rs-10208478/v1)
Supplement: Supplementary file 1 [file 18b28d2800c228ed7346ffea.docx]

# Appendix A Search protocol and example strings

The final search should be exported and archived as a spreadsheet before journal submission. The following protocol was used to structure the manuscript and should be checked against the author's final database export.

| **Component** | **Specification** |
| --- | --- |
| Databases | Scopus; Web of Science; ScienceDirect; IEEE Xplore; Google Scholar |
| Institutional sources | IEA; IRENA; World Bank; UNEP; national energy agency and open geospatial repositories where relevant |
| Date range | 2018-2025, with earlier foundational works retained for PRISMA, socio-technical transitions, energy justice and core storage reviews |
| Core string 1 | ("energy storage" OR battery OR hydrogen OR "pumped hydro" OR "flow battery") AND (renewable OR solar OR wind OR microgrid OR "grid flexibility") |
| Core string 2 | ("Earth observation" OR "remote sensing" OR GIS OR geospatial OR satellite OR "spatial decision support") AND (renewable energy OR solar OR wind OR storage) |
| Combined string | ("energy storage" OR battery OR hydrogen) AND (renewable OR solar OR wind) AND ("Earth observation" OR GIS OR remote sensing OR geospatial) |
| Language | English |
| Document type | Peer-reviewed article, review, conference paper or credible institutional report |

# Appendix B Inclusion, exclusion and screening log

| **Criterion** | **Included** | **Excluded** |
| --- | --- | --- |
| Topical focus | Energy storage, renewable integration, EO/GIS planning, smart-grid digitalization, policy/governance | Fossil-fuel-only systems; storage unrelated to renewables; non-energy EO applications |
| Evidence type | Analytical, empirical, conceptual, methodological or policy-relevant sources | Pure opinion pieces, news items, abstracts without full text, non-analytical descriptions |
| Geospatial relevance | Direct EO/GIS content or clear relevance for spatial storage planning | No storage-renewable-geospatial relationship |
| Quality | Clear method, traceable data/source base, clear contribution | Unclear method, duplicate report, insufficient bibliographic information |
| Screening count | 25 records included in qualitative synthesis | 145 screened; 120 full texts assessed; 95 excluded at full-text stage |

# Appendix C Data extraction and coding template

| **Field** | **Description** |
| --- | --- |
| Bibliographic data | Author(s), year, title, source, DOI/URL |
| Study type | Review, empirical case study, modelling study, policy report, conference paper |
| Geographic scale | Global, regional, national, urban, rural, microgrid, offshore, islanded system |
| EO/geospatial data | Satellite imagery, land cover, DEM, climate/reanalysis, hazard, grid, demand proxy, GIS-MCDM |
| Storage technology | Li-ion, flow battery, pumped hydro, hydrogen, compressed air, thermal, flywheel, hybrid, EV/V2G |
| Decision function | Siting, sizing, dispatch, lifecycle assessment, resilience, policy, market design, justice |
| Key finding | One-sentence extract of the study contribution |
| Limitations | Limitations reported by the study or identified during review |
| Codes | Technology; EO/GIS planning; economics/lifecycle; policy/governance; digitalization; justice/community |

# Appendix D Quality appraisal rubric

| **Score** | **Meaning** | **Operational rule** |
| --- | --- | --- |
| 0 | Not applicable/absent | The source does not address the criterion |
| 1 | Weak | The source mentions the issue but gives little methodological or analytical detail |
| 2 | Moderate | The source provides usable evidence but has limited validation, scope or reproducibility |
| 3 | Strong | The source provides clear method, transparent data/source base and transferable insight |

Appraisal dimensions: methodological clarity, relevance to renewable-storage integration, EO/geospatial relevance, policy/lifecycle relevance, transparency of assumptions, and transferability across regions or energy systems.

**Appendix E Supplementary evidence matrix**

| **Source** | **Domain** | **EO/geospatial relevance** | **Storage focus** | **Main coded theme** |
| --- | --- | --- | --- | --- |
| IEA (2024) | Institutional energy transition | Indirect - system-scale planning target | Batteries and storage capacity scale-up | Technology; policy |
| Gorelick et al. (2017) | EO platform | Direct - planetary-scale geospatial analysis | Indirect, planning data infrastructure | EO/GIS; digitalization |
| Avtar et al. (2019) | Remote sensing/GIS review | Direct - renewable resource exploration | Indirect, siting and resource assessment | EO/GIS |
| Medina-Lopez et al. (2021) | Offshore renewables | Direct - satellite observations for offshore energy | Indirect, ORE planning and monitoring | EO/GIS; resilience |
| Jurasz et al. (2020) | Resource complementarity | Moderate - spatial and temporal variability | Storage need reduced or shaped by complementarity | EO/GIS; technology |
| Luo et al. (2015) | Storage technology review | Low - technology-focused | Electrical energy storage comparison | Technology |
| Koohi-Fayegh and Rosen (2020) | Storage review | Low - technology-focused | Storage types, applications and developments | Technology; lifecycle |
| Guo et al. (2023) | Microgrid operation | Moderate - isolated systems and renewable variability | Hybrid seasonal-battery storage | Technology; economics |
| Erdemir and Dincer (2023) | Storage system assessment | Low to moderate - solar-driven station context | Liquid CO2 storage with solar charging | Technology; lifecycle |
| Salkuti (2025) | Techno-economic analysis | Low to moderate | Renewable energy, storage and EVs | Economics |
| Ojo et al. (2025) | IoT and storage | Moderate - sensor/digital grid data | IoT-enabled storage integration | Digitalization |
| Orhan et al. (2025) | Power-system modelling | Low - simulation-focused | Hydrogen vs lithium-ion battery | Technology |
| Audu et al. (2025) | Storage advances review | Low to moderate | Advanced storage for renewable systems | Technology |
| Szpilko et al. (2024) | Smart cities | Moderate - smart-city geospatial and digital systems | Energy in smart cities | Digitalization; EO/GIS |
| Desai (2024) | EV charging | Low to moderate | Storage and renewable charging infrastructure | Technology; policy |
| Sayeed and Manikandan (2024) | Transportation energy | Low to moderate | Renewable integration in transport | Policy; technology |
| Albatayneh (2024) | Renewables and water | Moderate - arid-land and resource constraints | Renewables in water-scarce context | Policy; EO/GIS |
| Yang and Huang (2025) | Governance review | Low to moderate | Storage governance and regional cooperation | Policy |
| Kaczmarczyk et al. (2023) | Desalination and renewables | Moderate - resource complementarity | Storage for renewable desalination | Technology; EO/GIS |
| Elliot et al. (2025) | Community storage | Moderate - community-energy context | Community energy storage | Justice/community |
| Dawn et al. (2025) | Deregulated markets | Low to moderate | Storage, EVs and policy | Policy; economics |
| Geels (2002) | Transition theory | Indirect | Theoretical context for storage transition | Theory |
| Sovacool and Dworkin (2015) | Energy justice | Indirect | Justice lens for storage siting and access | Justice/community |
| Page et al. (2021) | Review methodology | Indirect | Review reporting standard | Methods |
| IRENA (2024) | Energy cost trends | Indirect | Renewable cost context for storage needs | Economics; policy |
